# Supplementary material
Source: Springer Nature journal article supplement (https://www.springermedizin.de/resource/supplementary/12877_2011_683_MOESM1_ESM.pdf/9439992)
Supplement: MOESM1 [file 9439992]

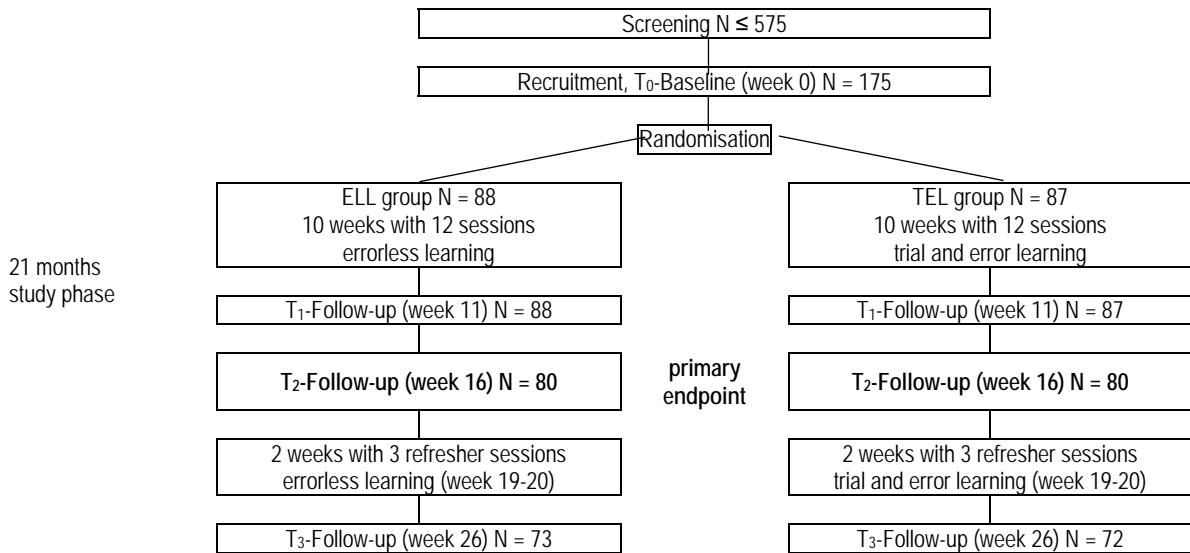

5 months  
analysis and  
implementation

- Data cleaning, final entry control and analysis of data
- Writing and submission of scientific papers
- Completion of guideline and seminar concept for practitioners

ELL=Errorless Learning; TEL=Trial and Error Learning
